# Supplementary material
Source: ML conference proceedings conference paper supplement (https://openreview.net/forum?id=DvRTU1whxF)
Supplement: supplementary_material [file attachment]

# 1 Appendix

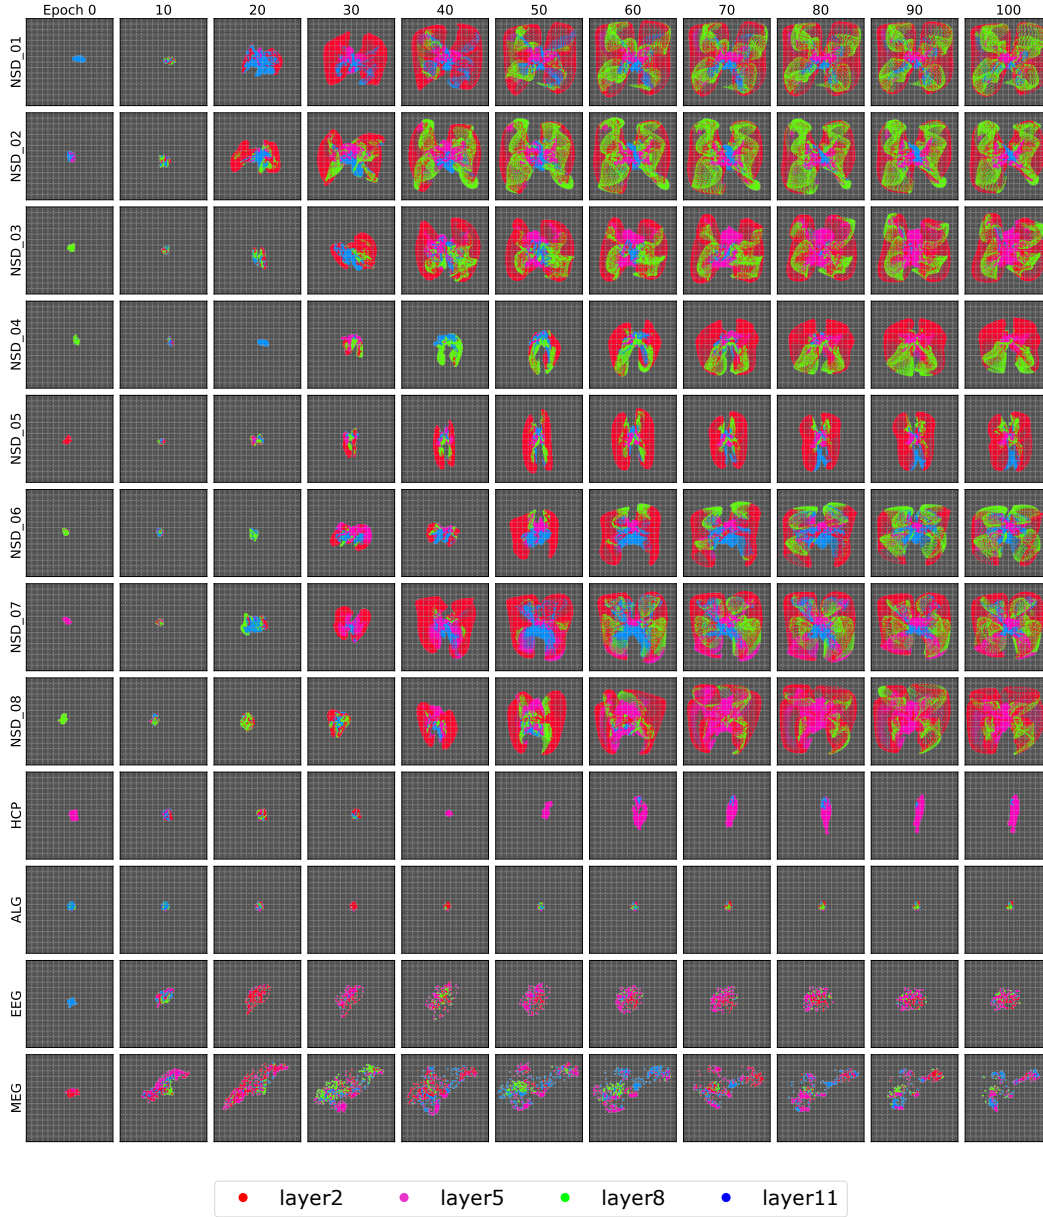

Figure 1: Retinotopic behavior emerges during training. 2D Grid (*RetinaGrid*) is latent image space. Each dot on *RetinaGrid* is a voxel of neurons, mapped from 3D physical space to 2D by *RetinaMapper*. Color is made by  $\text{argmax}$  of the *LayerSelector*, colors indicate selection of layers. Models are trained separately with all voxels of each subject.

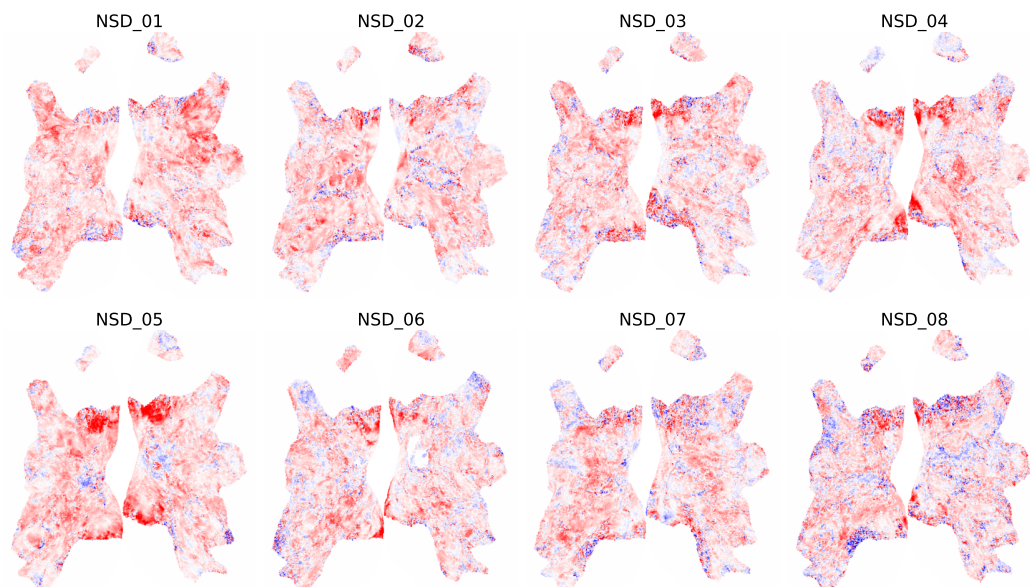

(a) AFO - NaiveMix

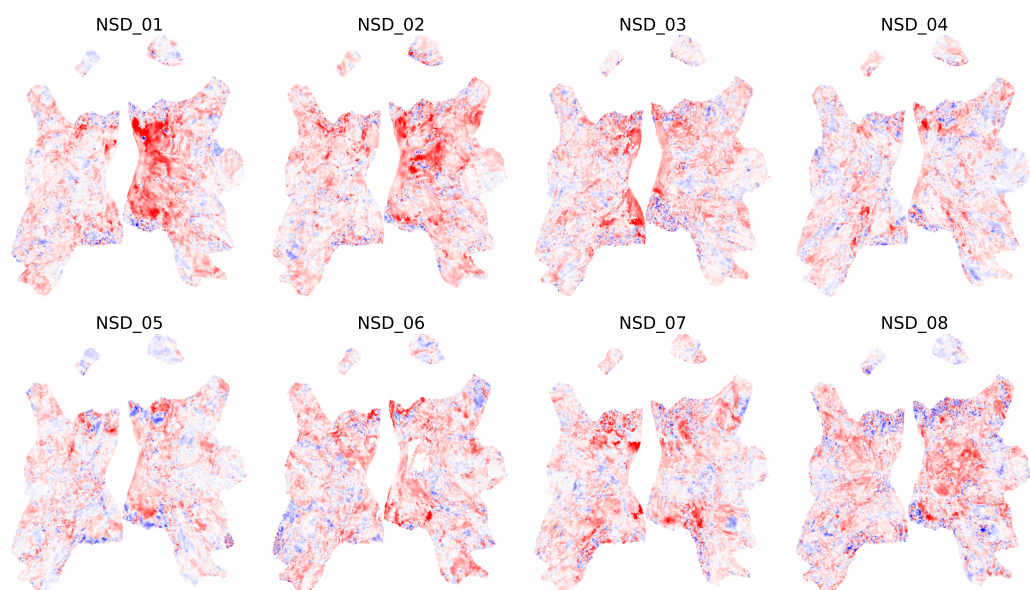

(b) AFO - ROI

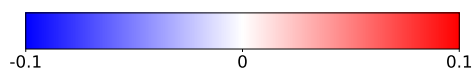

Figure 2: Per-voxel score difference of (a) All-for-One v.s. Naive Mix, (b) All-for-One v.s. ROI models (AFO stage one). Score is Pearson's correlation coefficient across test-set datas.

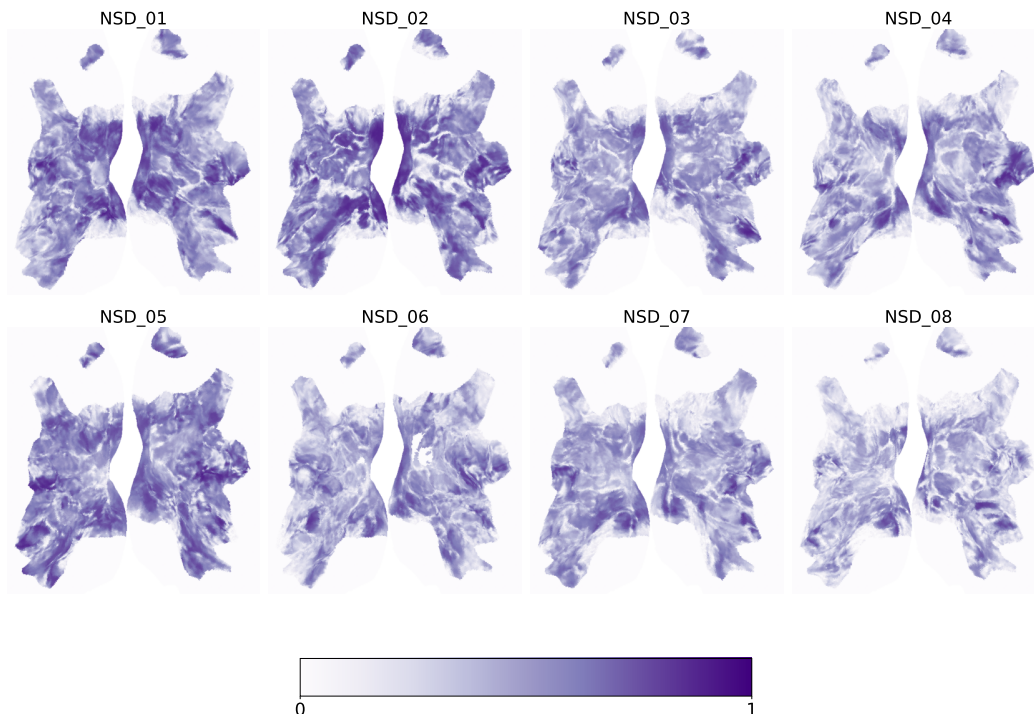

Figure 3: Per-voxel score of the best All-for-One model. Score is Pearson’s correlation coefficient across test-set datas.

Table 1: *TopyNeck* with frozen image backbone. Image backbone is trained on training subjects and kept frozen, *TopyNeck* is trained on the transfer subject with frozen backbone and trainable *RetinaMapper*, *LayerSelector*, and per-voxel linear regression. The 5 training datasets includes NSD, EEG, MEG, ALG, and HCP, holdout sets are fMRI and BOLD5K. The reported numbers are the average Pearson correlation coefficient across all voxels. Results are averaged over three runs.

| Recipe    | Training Dataset | Training Subject | Transfer Subject |              |              |              |              |              |
|-----------|------------------|------------------|------------------|--------------|--------------|--------------|--------------|--------------|
|           |                  |                  | NSD 01           | NSD 08       | EEG 01       | MEG 01       | fMRI 01      | BOLD5K 01    |
| AFO       | 5                | ALL              | <b>0.475</b>     | 0.310        | 0.206        | <b>0.181</b> | <b>0.268</b> | <b>0.240</b> |
|           | 5                | ALL              | 0.471            | <b>0.314</b> | 0.199        | 0.171        | 0.257        | 0.234        |
|           | NSD              | 01               | 0.443            | -            | -            | -            | -            | -            |
|           | NSD              | 08               | -                | 0.269        | -            | -            | -            | -            |
|           | NSD              | ALL              | 0.471            | 0.311        | -            | -            | -            | -            |
| Naive Mix | EEG              | 01               | -                | -            | 0.170        | -            | -            | -            |
|           | EEG              | ALL              | -                | -            | <b>0.209</b> | -            | -            | -            |
|           | MEG              | 01               | -                | -            | -            | 0.101        | -            | -            |
|           | MEG              | ALL              | -                | -            | -            | 0.153        | -            | -            |
|           | fMRI             | 01               | -                | -            | -            | -            | 0.157        | -            |
|           | fMRI             | ALL              | -                | -            | -            | -            | 0.218        | -            |
|           | BOLD5K           | 01               | -                | -            | -            | -            | -            | 0.204        |
|           | BOLD5K           | ALL              | -                | -            | -            | -            | -            | 0.223        |
